# Supplementary material
Source: PubMed Central journal article supplement (PMC3716161)
Supplement: AAC.00191-13_zac999101883so1.pdf [file AAC.00191-13_zac999101883so1.pdf]

## Supplementary material

S1 Parameter estimates with relative standard errors (RSE) of the final model excluding one strongly deviating subject.

; Model description: Study ACTG 5267: BDQ + M2 + M3

; Elin Svensson, Pharmacometrics Research Group, Uppsala University

\$PROB Study ACTG5267

\$DATA TMC207\_EFV\_ACTGstudy20120717.csv IGNORE=@

\$INPUT ID DUMID DROP STUDYDAY DAT2=DROP TIME TAD TMCDOSE DOSE2 EVID MDV AMT DROP DROP FLAG CMT DVMG LNDVMG DVMOL  
CPAR CM2 DV L2 ZEROO LLOQ BQL EFV GENDER RACE DROP AGE DROP DROP METAB HT WTOLD WT ALB

\$SUBROUTINE ADVAN6 TOL=6

\$MODEL NCOMPARTMENTS=8

COMP=(DEPOT DEFDOSE)

COMP=(CENTRAL DEFOBSERVATION)

COMP=(PERI1)

COMP=(PERI2)

COMP=(M2)

COMP=(M3)

COMP=(M2P1)

COMP=(M3P1)

\$PK

;--- Typical values fixed effects

TVMTT = THETA(1)

TVKA= THETA(2)

TVCL= THETA(3)

TVV= THETA(4)

TVQ1 = THETA(5)

TVVP1 = THETA(6)

TVQ2 = THETA(7)

TVVP2 = THETA(8)

TVCLM2 = THETA(9)

TVVM2 = THETA(10)

TVQ1M2 = THETA(11)

TVVP1M2 = THETA(12)

EFVEFF1 = THETA(13)

TVCLM3= THETA(14)

TVVM3= THETA(15)

TVQ1M3= THETA(16)

TVVP1M3= THETA(17)

EFVEFFM3 = THETA(18)

;--- Variability

BOVF = ETA(1)

IF(TMCDOSE.EQ.2) BOVF = ETA(2)

BSVF = ETA(3)

BOVMTT = ETA(4)

IF(TMCDOSE.EQ.2) BOVMTT = ETA(5)

BSVCL= ETA(6)

BSVCLM2= ETA(7)

BSVCLM3= ETA(8)

BSVEFVEFF1 = ETA(9)

BSVEFVEFF2 = ETA(10)

BSVEFVEFF3 = ETA(11)

BSVV= ETA(12)

BSVQ1= ETA(13)

BSVVM2= ETA(14)

BSVVP1M2= ETA(15)

; Allometric scaling

$$\text{ALLCL} = (\text{WT}/70)^{**0.75}$$

$$\text{ALLV} = \text{WT}/70$$

; Effect of EFV on CL

$$\text{EFVE1} = \text{EFVEFF1} * \text{EXP}(\text{BSVEFVEFF1})$$

$$\text{EFVE2} = \text{EFVEFF1} * \text{EXP}(\text{BSVEFVEFF2})$$

$$\text{EFVE3} = \text{EFVEFFM3} * \text{EXP}(\text{BSVEFVEFF3})$$

;--- Parameters

$$\text{KA} = \text{TVKA}$$

$$\text{MTT} = \text{TVMTT} * \text{EXP}(\text{BOVMTT})$$

$$\text{CL} = \text{TVCL} * \text{ALLCL} * \text{EXP}(\text{BSVCL})$$

$$\text{IF}(\text{TAD.GT.504.OR.TMCDOSE.EQ.2}) \text{ CL} = \text{TVCL} * \text{ALLCL} * \text{EXP}(\text{BSVCL}) * \text{EFVE1}$$

$$\text{V} = \text{TVV} * \text{ALLV} * \text{EXP}(\text{BSVV})$$

$$\text{Q1} = \text{TVQ1} * \text{ALLCL} * \text{EXP}(\text{BSVQ1})$$

$$\text{VP1} = \text{TVVP1} * \text{ALLV}$$

$$\text{Q2} = \text{TVQ2} * \text{ALLCL}$$

$$\text{VP2} = \text{TVVP2} * \text{ALLV}$$

CLM2 = TVCLM2\*ALLCL\*EXP(BSVCLM2)

IF(TAD.GT.504.OR.TMCDOSE.EQ.2) CLM2 = TVCLM2\*ALLCL\*EXP(BSVCLM2)\*EFFE2

VM2= TVVM2\*ALLV\*EXP(BSVVM2)

Q1M2 = TVQ1M2\*ALLCL

VP1M2= TVVP1M2\*ALLV\*EXP(BSVVP1M2)

CLM3 = TVCLM3\*ALLCL\*EXP(BSVCLM3)

IF(TAD.GT.504.OR.TMCDOSE.EQ.2) CLM3 = TVCLM3\*ALLCL\*EXP(BSVCLM3)\*EFFE3

VM3 = TVVM3\*ALLV

Q1M3 = TVQ1M3\*ALLCL

VP1M3 = TVVP1M3\*ALLV

;--- Scaling factors

S2=V

S5=VM2

S6=VM3

;--- To stratify VPC

STRT = EFV+2\*FLAG

;--- Reorder to get correct order in VPC

VPCLOC = 1

IF(STRT.EQ.2) VPCLOC= 4

IF(STRT.EQ.4) VPCLOC= 5

IF(STRT.EQ.5) VPCLOC= 2

IF(STRT.EQ.6) VPCLOC= 6

IF(STRT.EQ.7) VPCLOC= 3

;--- Calc time after dose

TADD = TAD/24

TADW = TAD/(24\*7)

;--- Transit model - code by Paolo Denti

IF (NEWIND.NE.2.OR.EVID.GE.3) THEN ; beginning of dataset, or new individual

    TNXD=TIME ; TIME will be the time of the first record of that subject even if it's not a dose, but...

    PNXD=AMT ; ...the amount will be 0 if the first record is not a dose, so no problem.

ENDIF

TDOS=TNXD ; This will either save here the temporary values if it's a new individual...

PD=PNXD ; ...or the values which were read one record ahead during the execution of the previous record.

IF(AMT.GT.0) THEN ; This reads one record ahead and stores the data to be used when running the following record

    TNXD=TIME

    PNXD=AMT

ENDIF

IF (DOSTIM.GT.0) THEN ; This will account for the ADDL or lagged doses

    TNXD=DOSTIM

    PNXD=AMT

ENDIF

F1=0 ; Nothing goes directly in to compartment 1

BIO=720.072\*EXP(BOVF+BSVF) ; AMT=1 in input file, dose was 400 mg, MW TMC207 555.5 g/mol, DV as nmol/mL =  $\mu\text{mol/L}$  -->  
 $(400/1000)/(555.5)*1000000 = 720.1 \mu\text{mol}$

NN=THETA(19)

KTR=((NN+1)/MTT)

L =  $0.9189385 + (NN + 0.5)*\text{LOG}(NN) - NN + \text{LOG}(1 + 1/(12*NN))$  ; approximation to the natural logarithm of the gamma function

;--- Shorter run time when calculations outside \$des block

BIOPD=BIO\*PD

IF (BIOPD.EQ.0) BIOPD=BIOPD+0.00001

LBPD = LOG(BIOPD)

LKTR = LOG(KTR)

PIZZA = LBPD + LKTR - L

\$DES

TEMPO=T-TDOS ; This is time after dose, it should always be >= 0

IF(TEMPO.GT.0) THEN

    KTT=KTR\*TEMPO

    DADT(1) = EXP(PIZZA+NN\*LOG(KTT)-KTT) -A(1)\*KA

ELSE

    DADT(1)=0 ; Executed only when TEMPO=0, or before the first dose is given

ENDIF

DADT(2) = A(1)\*KA - A(2)\*CL/V - A(2)\*Q1/V + A(3)\*Q1/VP1 - A(2)\*Q2/V + A(4)\*Q2/VP2 ; BDQ

DADT(3) = A(2)\*Q1/V - A(3)\*Q1/VP1

DADT(4) = A(2)\*Q2/V - A(4)\*Q2/VP2

DADT(5) = A(2)\*CL/V - A(5)\*CLM2/VM2 - A(5)\*Q1M2/VM2 + A(7)\*Q1M2/VP1M2 ; M2

DADT(6) = A(5)\*CLM2/VM2 - A(6)\*CLM3/VM3 - A(6)\*Q1M3/VM3 + A(8)\*Q1M3/VP1M3 ; M3

DADT(7) = A(5)\*Q1M2/VM2 - A(7)\*Q1M2/VP1M2

DADT(8) = A(6)\*Q1M3/VM3 - A(8)\*Q1M3/VP1M3

\$ERROR

DEL= 1E-12

IPRED=LOG(F+DEL) ; DV log-transformed

W = 1

IF(TAD.LE.6) W= W\* THETA(20) ; Weighting of residual error of samples during first 6 hours

BQLW=1

IF(BQL.EQ.1) BQLW=THETA(21) ; Weighting of residual error of samples < BQL

IRES=DV-IPRED

IWRES=IRES/W

Y = IPRED + W\*BQLW\*EPS(1) ; BDQ

IF(FLAG.EQ.2) Y = IPRED + W\*BQLW\*EPS(2) ; M2

IF(FLAG.EQ.3) Y = IPRED + W\*BQLW\*EPS(3) ; M3

\$THETA

(1E-06,1.31259) ; 1 MTT

(1E-06,0.127908) ; 2 KA

(1E-06,2.96031) ; 3 CL

(1E-06,17.3388) ; 4 V

(1E-06,5.01325) ; 5 Q1

(1E-06,2871.59) ; 6 VP1

(1E-06,4.15909) ; 7 Q2

(1E-06,135.807) ; 8 VP2

(1E-06,12.3361) ; 9 CLM2

(1E-06,658.569) ; 10 VM2

(1E-06,102.953) ; 11 Q1M2

(1E-06,2836.17) ; 12 VP1M2

(1,2.06878) ; 13 EFVEFF BDQCL

(1E-06,39.1751) ; 14 CLM3

(3,11.2449) ; 15 VM3

(1E-06,106.107) ; 16 QM3

(1E-06,2679.86) ; 17 VPM3

(1,1.12233) ; 18 EFVEFF M3

(0,5.20689) ; 19 NN

(0,1.8709) ; 20 Weigting of samples <6h

(0,3.28215) ; 21 Weighting of BQL samples

\$OMEGA BLOCK(1)

0.0555944 ; 1 BOV F

\$OMEGA BLOCK(1) SAME

\$OMEGA

0.058862 ; 3 BSV F

\$OMEGA BLOCK(1)

0.3074 ; 4 BOV MTT

\$OMEGA BLOCK(1) SAME

\$OMEGA BLOCK(6)

0.0559648 ; 6 BSV CLBDQ

0.0131626 0.035439 ; 7 BSV CLM2

-0.00914441 0.0402624 0.0902629 ; 8 BSV CLM3

-0.0337552 -0.0217602 -0.0138624 0.0425689 ; 9 BSV EFVEFF1

-0.0198463 -0.0408591 -0.0609976 0.043842 0.0796311 ; 10 BSV EFVEFF2

-0.00571503 -0.0358474 -0.0820472 0.0286691 0.0811359 0.106536 ; 11 BSV EFVEFF3

\$OMEGA

0.120173 ; 12 BSV V

0.034759 ; 13 BSV Q1

0.0833384 ; 14 BSV VM2

0.0671284 ; 15 BSV VP1M2

\$SIGMA BLOCK(3)

0.0572037 ; 1 Prop error BDQ

0.0220711 0.03124 ; 2 Prop error M2

0.005659 0.013683 0.0225068 ; 3 Prop error M3

\$ESTIMATION METHOD=1 MAXEVAL=9999 INTERACTION PRINT=1 SIGL=6 NSIG=2 PRINT=1 NOABORT MSFO=run569.msf

\$COVARIANCE PRINT=E

;\$TABLE

## Supplementary material

### S2 Parameter estimates with relative standard errors (RSE) of the final model excluding one strongly deviating subject.

| Fixed effects <sup>‡</sup> (RSE) |              | Random effects [CV%] (RSE) |                 |                 |                 |              |                |               |
|----------------------------------|--------------|----------------------------|-----------------|-----------------|-----------------|--------------|----------------|---------------|
| MTT [h]                          | 1.38 (14.1%) | BOV F                      | 16.2% (21.1%)   |                 |                 |              |                |               |
| KA [h <sup>-1</sup> ]            | 0.127 (9.1%) | BSV F                      | 17.8% (19.0%)   |                 |                 |              |                |               |
| CL [L h <sup>-1</sup> ]          | 2.69 (19.7%) | BOV MTT                    | 52.9% (11.2%)   |                 |                 |              |                |               |
| V [L]                            | 15.6 (18.1%) | BSV CL                     | 24% (11.9%)     |                 |                 |              |                |               |
| Q1 [L h <sup>-1</sup> ]          | 4.92 (12.1%) | BSV CLM2                   | 28.1%* (31.5%)  | 18% (23.7%)     |                 |              |                |               |
| VP1 [L]                          | 3080 (31.3%) | BSV CLM3                   | -11.5%* (90.8%) | 73.6%* (34.5%)  | 30.4% (24.9%)   |              |                |               |
| Q2 [L h <sup>-1</sup> ]          | 3.98 (9.6%)  | BSV EFVEFF-BDQ             | -67.3%* (13.8%) | -51.9%* (24.1%) | -23.3%* (64.7%) | 20% (10.8%)  |                |               |
| VP2 [L]                          | 135 (12.4%)  | BSV EFVEFF-M2              | -25.5%* (36.6%) | -73%* (29.5%)   | -72.6%* (32.8%) | 73.5%* (17%) | 27.3% (22.1%)  |               |
| CLM2 [L h <sup>-1</sup> ]        | 11.2 (18.1%) | BSV EFVEFF-M3              | -6.4%* (164%)   | -58.4%* (43.2%) | -82.8%* (30.3%) | 44%* (35.2%) | 90.1%* (27.2%) | 32.8% (25.0%) |
| VM2 [L]                          | 620 (12.9%)  | BSV V                      | 31.4% (34.8%)   |                 |                 |              |                |               |
| Q1M2 [L h <sup>-1</sup> ]        | 95.3 (12.5%) | BSV Q1                     | 18.7% (16.1%)   |                 |                 |              |                |               |
| VP1M2 [L]                        | 2720 (16.2%) | BSV VM2                    | 26.8% (18.8%)   |                 |                 |              |                |               |
| CLM3 [L h <sup>-1</sup> ]        | 2.13 (14%)   | BSV VP1M2                  | 15.9% (24.7%)   |                 |                 |              |                |               |
| VM3 [L]                          | 35.8 (27.2%) |                            |                 |                 |                 |              |                |               |
| QM3 [L h <sup>-1</sup> ]         | 8.38 (1330%) | Prop error TMC             | 24.2% (5.3%)    |                 |                 |              |                |               |
| VPM3 [L]                         | 98.4 (52.6%) | Prop error M2              | 15%* (6.1%)     | 17.7% (4.8%)    |                 |              |                |               |
| EFVEFF BDQ and M2                | 2410 (12%)   | Prop error M3              | 7.5%* (21.4%)   | 11.3%* (5.6%)   | 17.7% (10.2%)   |              |                |               |
| EFVEFF M3                        | 1.14 (21.8%) |                            |                 |                 |                 |              |                |               |
| NN                               | 5.12 (24.4%) |                            |                 |                 |                 |              |                |               |
| Error weight TAD <6h             | 1.88 (10.9%) |                            |                 |                 |                 |              |                |               |
| Error weight <BQL                | 3.36 (18.3%) |                            |                 |                 |                 |              |                |               |

Abbreviations: MTT = mean transit time, KA = absorption rate constant, F = bioavailability, CL = clearance, V = volume of distribution, Q = intercompartmental clearance, VP = volume of distribution of peripheral compartments, EFVEFF = induction effect of EFV, NN = number of transit compartments, TAD = time after dose, BLQ = below limit of quantification, Prop = proportional, BOV = between occasion variability, BSV = between subject variability, RSE = relative standard error, CV% = coefficient of variation as percentage

‡ estimated with typical value of F fixed to one.

\* correlation estimated as a covariance.
